# Supplementary material for: First case of an invasive Bacteroides dorei infection detected in a patient with a mycotic aortic aneurysm—raising a rebellion of major indigenous bacteria in humans: a case report and review
Source: Springer Nature journal article supplement (doi:10.1186/s12879-021-06345-8), 2021-06-30
Supplement: MOESM1 [file 19315686]

## **Additional file 1**

### **Results of the database search using the 16S rRNA gene sequence read.**

The nucleotide sequence was compared against the NCBI Bacteria & Archaea Isolate Database, with the statistical significance calculated by BLAST. The closest known bacteria are listed in the table with query cover rates, sequence identity rates and BLAST scores. BLAST: Basic Local Alignment Search Tool; NCBI: National Center for Biotechnology Information
