# Supplementary material for: First case of an invasive Bacteroides dorei infection detected in a patient with a mycotic aortic aneurysm—raising a rebellion of major indigenous bacteria in humans: a case report and review
Source: Springer Nature journal article supplement (doi:10.1186/s12879-021-06345-8), 2021-06-30
Supplement: MOESM2 [file 19315686]

## **Additional file 2**

### **Alignment of the 16S rRNA gene sequence from the type strain of *Bacteroides dorei* (DSM 17855) and**

**that obtained by Sanger sequencing from the patient's specimen.** Total genomic DNA was purified from the

patient's infected aortic wall and subjected to PCR amplification using the 500F (5'-

GGATTAGATACCCTGGTA-3') and 1500R (5'-TACCTTGTTACGACTT-3') universal primers. Sanger

sequencing of the amplicon was performed, and the sequence obtained for the single-peak electropherogram

read was compared with that of the type strain of *B. dorei* (DSM 17855). The 500F and 1500R primers are

shown as red arrows, and the aligned sequence is provided below the *B. dorei* 16S rRNA gene sequence. The

full-length sequence from the V5 to V9 segments completely coincides with the corresponding sequence of *B.*

*dorei*.

1 ATTTTACAA TGAAGAGTTT GATCCTGGCT CAGGATGAAC GCTAGCTACA GGCTTAACAC 60  
61 ATGCAAGTCG AGGGGCAGCA TGGTCTTAGC TTGCTAAGGC TGATGGCGAC CGGCGCACGG 120  
121 GTGAGTAACA CGTATCCAAC CTGCCGTCTA CTCTTGGCCA GCCTTCTGAA AGGAAGATTA 180  
181 ATCCAGGATG GGATCATGAG TTCACATGTC CGCATGATTA AAGGTATTTT CCGGTAGACG 240  
241 ATGGGGATGC GTTCCATTAG ATAGTAGGCG GGGTAAACGGC CCACCTAGTC AACGATGGAT 300  
301 AGGGGTCTG AGAGGAAGGT CCCCACATT GGAAGTGAAG CACGGTCCAA ACTCCTACGG 360  
361 GAGGCAGCAG TGAGGAATAT TGGTCAATGG GCGATGGCCT GAACCAGCCA AGTAGCGTGA 420  
421 AGGATGACTG CCCTATGGGT TGTAAGTCTC TTTTATAAAG GAATAAAGTC GGGTATGCAT 480  
481 ACCCGTTTGC ATGTACTTTA TGAATAAGGA TCGGCTAACT CCGTGCCAGC AGCCGCGGTA 540  
541 ATACGGAGGA TCCGAGCGTT ATCCGGATTT ATTGGGTTTA AAGGGAGCGT AGATGGATGT 600  
601 TTAAGTCAGT TGTGAAAGTT TGC GGCTCAA CCGTAAAATT GCAGTTGATA CTGGATGTCT 660  
661 TGAGTGCAGT TGAGGCAGGC GGAATTCGTG GTGTAGCGGT GAAATGCTTA GATATCACGA 720  
721 AGAACTCCGA TTGCGAAGGC AGCCTGCTAA GCTGCAACTG ACATTGAGGC TCGAAAGTGT 780  
781 GGGTATCAAA CA **800F primer**  
**GGATTAGA TACCCTGGTA** GTCCACACGG TAAACGATGA ATACTCGCTG 840  
**CTGGTA GTCCACACGG TAAACGATGA ATACTCGCTG**  
841 TTTGCGATAT ACGGCAAGCG GCCAAGCGAA AGCGTTAAGT ATTCCACCTG GGGAGTACGC 900  
**TTTGCGATAT ACGGCAAGCG GCCAAGCGAA AGCGTTAAGT ATTCCACCTG GGGAGTACGC**  
901 CGGCAACGGT GAAACTCAAA GGAATTGACG GGGGCCCGCA CAAGCGGAGG AACATGTGGT 960  
**CGGCAACGGT GAAACTCAAA GGAATTGACG GGGGCCCGCA CAAGCGGAGG AACATGTGGT**  
961 TTAATTCGAT GATACGCGAG GAACCTTACC CGGGCTTAAA TTGCACTCGA ATGATCCGGA 1020  
**TTAATTCGAT GATACGCGAG GAACCTTACC CGGGCTTAAA TTGCACTCGA ATGATCCGGA**  
1021 AACGGTTCAG CTAGCAATAG CGAGTGTGAA GGTGCTGCAT GGTGTGTCGTC AGCTCGTGCC 1080  
**AACGGTTCAG CTAGCAATAG CGAGTGTGAA GGTGCTGCAT GGTGTGTCGTC AGCTCGTGCC**  
1081 GTGAGGTGTC GGCTTAAAGT CCATAACGAG CGCAACCCTT GTTGTGAGTT ACTAACAGGT 1140  
**GTGAGGTGTC GGCTTAAAGT CCATAACGAG CGCAACCCTT GTTGTGAGTT ACTAACAGGT**  
1141 GATGCTGAGG ACTCTGACAA GACTGCCATC GTAAGATGTG AGGAAGGTGG GGATGACGTC 1200  
**GATGCTGAGG ACTCTGACAA GACTGCCATC GTAAGATGTG AGGAAGGTGG GGATGACGTC**  
1201 AAATCAGCAC GGCCCTTACG TCCGGGGCTA CACACGTGTT ACAATGGGGG GTACAGAGGG 1260  
**AAATCAGCAC GGCCCTTACG TCCGGGGCTA CACACGTGTT ACAATGGGGG GTACAGAGGG**  
1261 CCGCTACCAC GCGAGTGGAT GCCAATCCCT AAAACCCCTC TCAGTTCGGA CTGGAGTCTG 1320  
**CCGCTACCAC GCGAGTGGAT GCCAATCCCT AAAACCCCTC TCAGTTCGGA CTGGAGTCTG**  
1321 CAACCCGACT CCACGAAGCT GGATTCGCTA GTAATCGCGC ATCAGCCACG GCGCGGTGAA 1380  
**CAACCCGACT CCACGAAGCT GGATTCGCTA GTAATCGCGC ATCAGCCACG GCGCGGTGAA**  
1381 TACGTTCCCG GGCCTTGATC ACACCGCCCG TCAAGCCATG GGAGCCGGGG GTACCTGAAG 1440  
**TACGTTCCCG GGCCTTGATC ACACCGCCCG TCAAGCCATG GGAGCCGGGG GTACCTGAAG**  
1441 TGCCTAACCG CGAGGATCGC CCTAGGGTAA AACTGGTGAC TGGGGCTAAG **1500R primer**  
**TGCCTAACCG CGAGGATCGC CCTAGGGTAA AACTGGTGAC TGGGGCTAAG TC** 1500  
1501 **GTA**GCCGTAC CGGAAGGTGC GGCTGGAACA CCTCCTTTCT 1540
